# Supplementary material
Source: PubMed Central journal article supplement (PMC6377801)
Supplement: NIHMS1004358-supplement-1.pdf [file NIHMS1004358-supplement-1.pdf]

## Appendix A. Supplementary material

The following are the Supplementary data to this article:

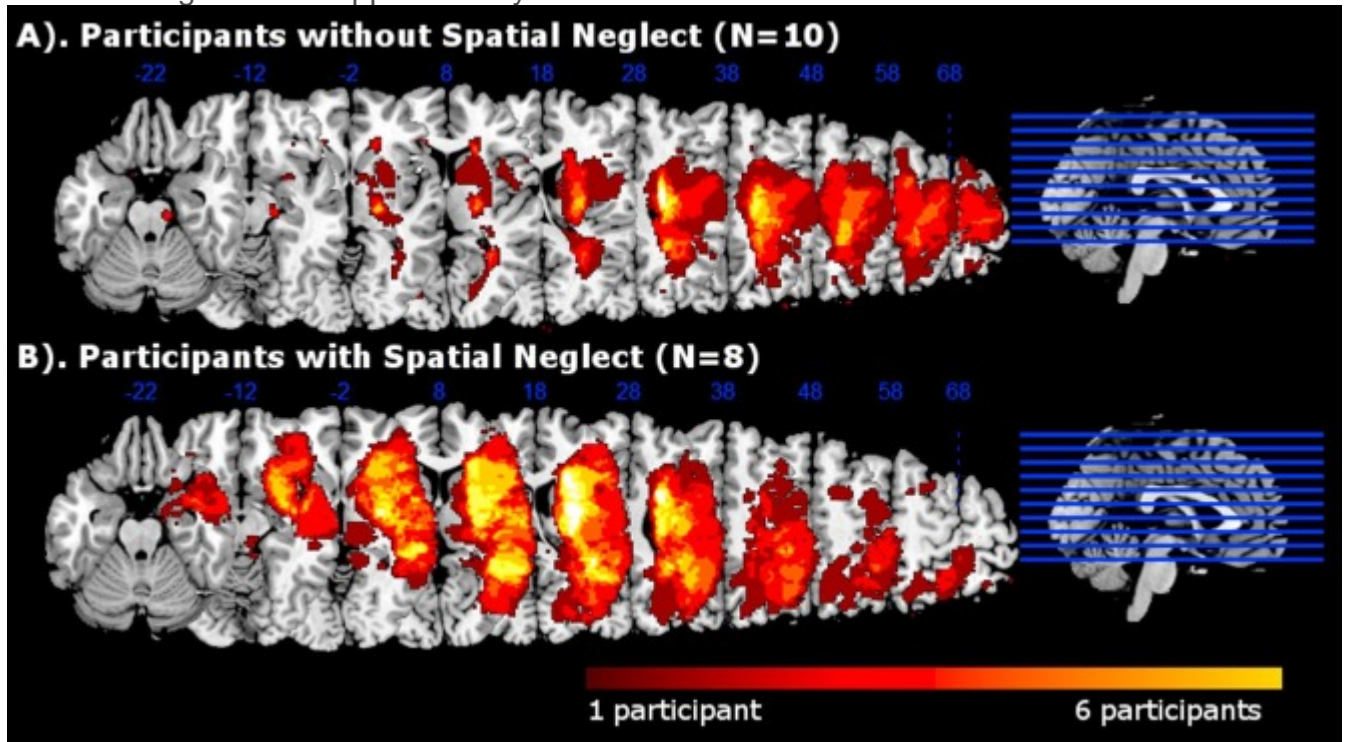

1. [Download high-res image \(283KB\)](#)
2. [Download full-size image](#)

Supplementary figure 1. Lesion coverage map by [spatial neglect](#) group (upper map A., without spatial neglect; lower map B., with spatial neglect). Hot color represents areas of stroke lesion overlap, with maximal overlap occurring in 6 participants in each group. Right brain is on the right side of image.

A). VAN in Participants without Spatial Neglect (FDR  $q=0.0005$ )

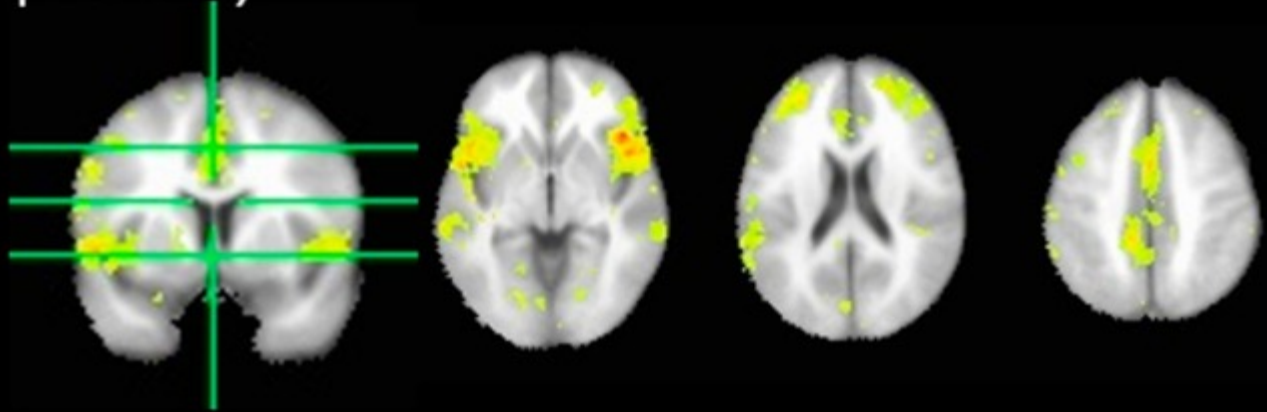

B). VAN in Participants with Spatial Neglect (FDR  $q=0.005$ )

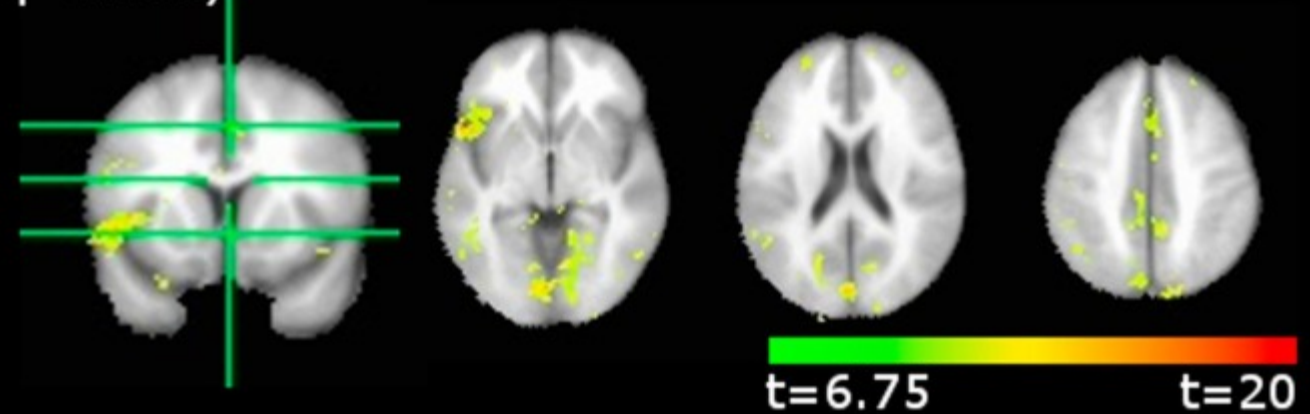

1. [Download high-res image \(183KB\)](#)
2. [Download full-size image](#)

Supplementary figure 2. Whole-brain **functional connectivity** for the ventral attention network (VAN) by spatial neglect group (upper map A., without spatial neglect; lower map B., with spatial neglect). The FDR-corrected threshold is provided for each group. Right brain is on the right side of image.
